# Supplementary material
Source: publisher figshare collection journal article supplement (https://gsapubs.figshare.com/articles/dataset/_/18174155)
Supplement: Supplementary file 1 [file 1]

## **SUPPLEMENTAL ONLINE MATERIAL**

### **Boron proxies record paleosalinity variation in the North American Midcontinent Sea in response to Carboniferous glacio-eustasy**

Wei Wei, Wenchao Yu, Thomas J. Algeo, Achim D. Herrmann, Lian Zhou, Jinhua Liu, Qian  
Wang, Yuansheng Du

## **AUXILIARY FIGURES**

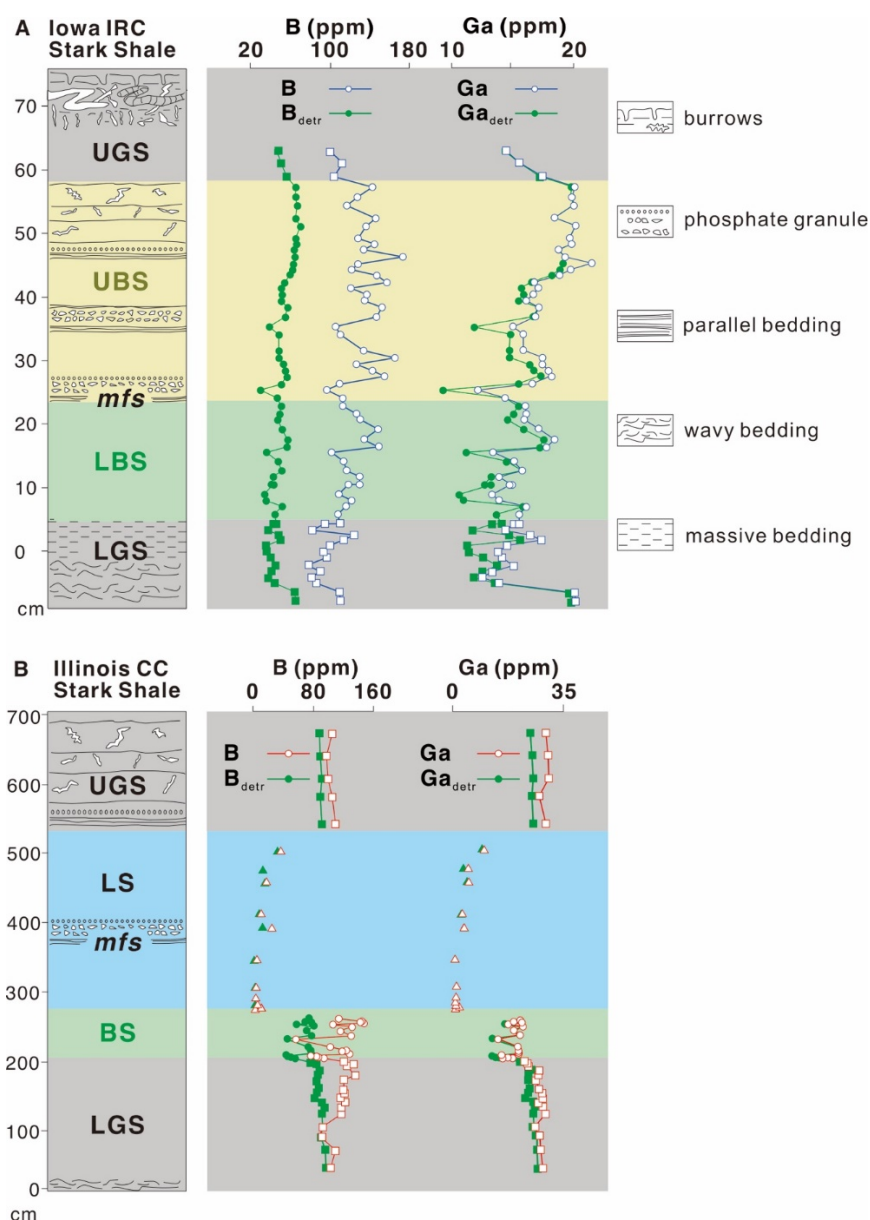

Figure S1. B and Ga concentrations of Stark Shale from (A) IRC and (B) CC. BS = black shale (circles), GS = gray shale (squares), LS = limestone (triangles;  $\text{CaCO}_3 > 40\%$ ), and “L” and “U” prefixes for BS and GS indicate “lower” and “upper”, respectively. *mfs* = maximum flooding surface; detr = detrital. Note that the difference between the total concentration and the detrital fraction (for either B or Ga) represents the seawater-sourced (hydrogenous) fraction. For calculation of detrital B and Ga concentrations, see below.

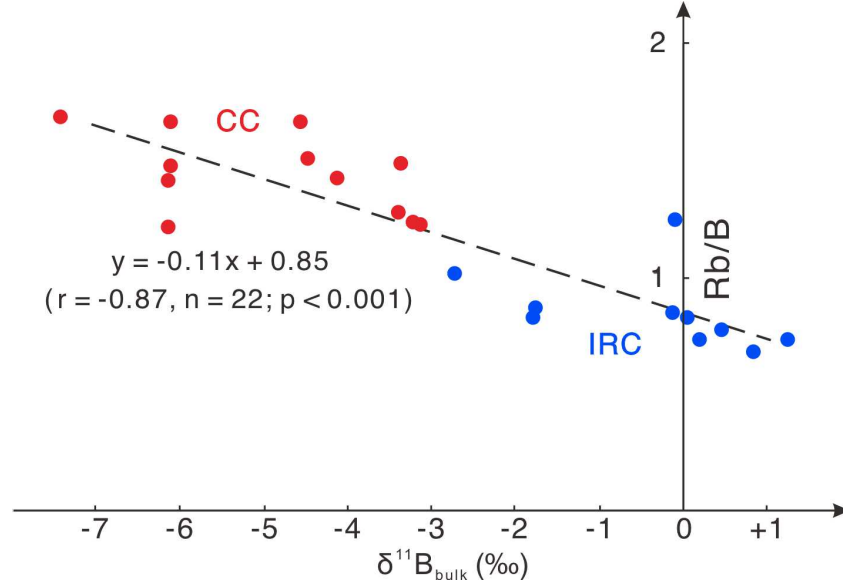

Figure S2. Crossplot of Rb/B versus  $\delta^{11}\text{B}$  for shale samples from IRC (blue) and CC (red), showing strong negative covariation ( $r = -0.87$ ;  $p < 0.001$ ). This relationship reflects mixing of Rb-rich illite (deposited more proximally) and Rb-poor smectite (deposited more distally) and is similar to that reported for modern marine shales (Ishikawa and Nakamura, 1993). B in the illitic component is mostly detrital in origin and exhibits  $\delta^{11}\text{B}$  closer to the detrital value ( $-9.1\text{‰}$ ), whereas a large fraction of B in the smectitic component is in the form of  $\text{B}(\text{OH})_4^-$  adsorbed from seawater ( $\sim +19\text{‰}$  to  $+24\text{‰}$ ), yielding higher bulk-shale  $\delta^{11}\text{B}$ . This relationship supports interpretation of bulk-shale  $\delta^{11}\text{B}$  as an effective paleosalinity proxy.

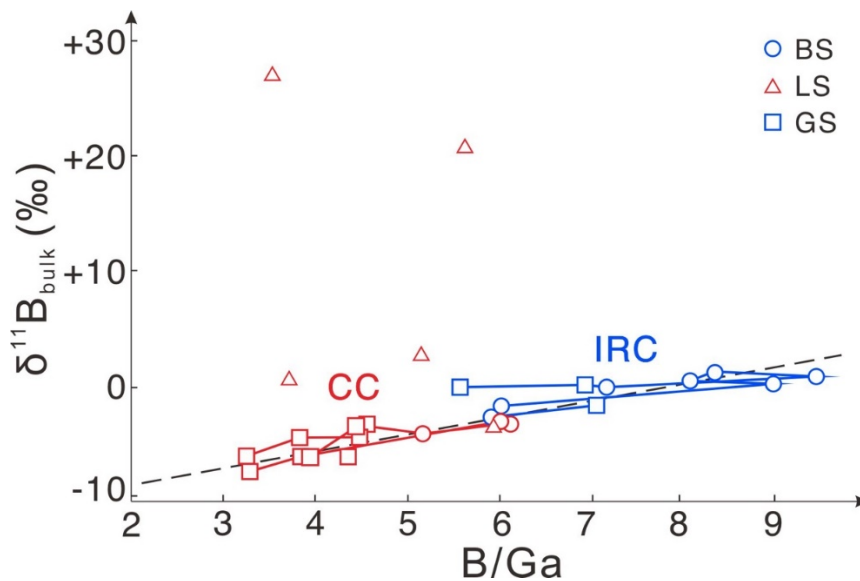

Figure S3. Crossplot of  $\delta^{11}\text{B}$  versus B/Ga for both shale and limestone samples from IRC (blue) and CC (red). The few limestone samples (LS, triangles;  $n = 5$ ) analyzed in this study yield higher  $\delta^{11}\text{B}$  (to +27‰) and are non-colinear with the black shales (BS, circle) and gray shales (GS, squares) [note: shale data and dashed regression line are the same as those in Figure 3 of the main text]. Note that B/Ga values at CC are similar for both shale and limestone samples, suggesting that the B/Ga of both lithologies is a robust paleosalinity proxy; differences in their  $\delta^{11}\text{B}$  values may reflect lithology-dependent B species uptake or the lack of detrital B in the limestone samples.

### **ROLE OF NORMALIZATION OF BORON TO GALLIUM**

The reason for using an elemental ratio (i.e., B/Ga) rather than a simple concentration (i.e., [B]) to evaluate paleosalinity is that concentrations are highly susceptible to lithologic influences—for example, [B] is typically 15-20 ppm in shales but <1 ppm in limestones, so [B] variation will be heavily influenced by lithology in mixed limestone-shale successions. The elements B, Al, and Ga all belong to Group 13 (“boron group”) of the periodic table. The advantages of Ga rather than Al as a normalizer for B are that, compared to Al, the concentration of Ga in the sediment is much closer to that of B, and its behavior in aqueous systems is opposite that of B (i.e., Ga concentrations are higher in freshwater systems), enhancing the effectiveness of B/Ga as a paleosalinity proxy ([Wei and Algeo, 2020](#)).

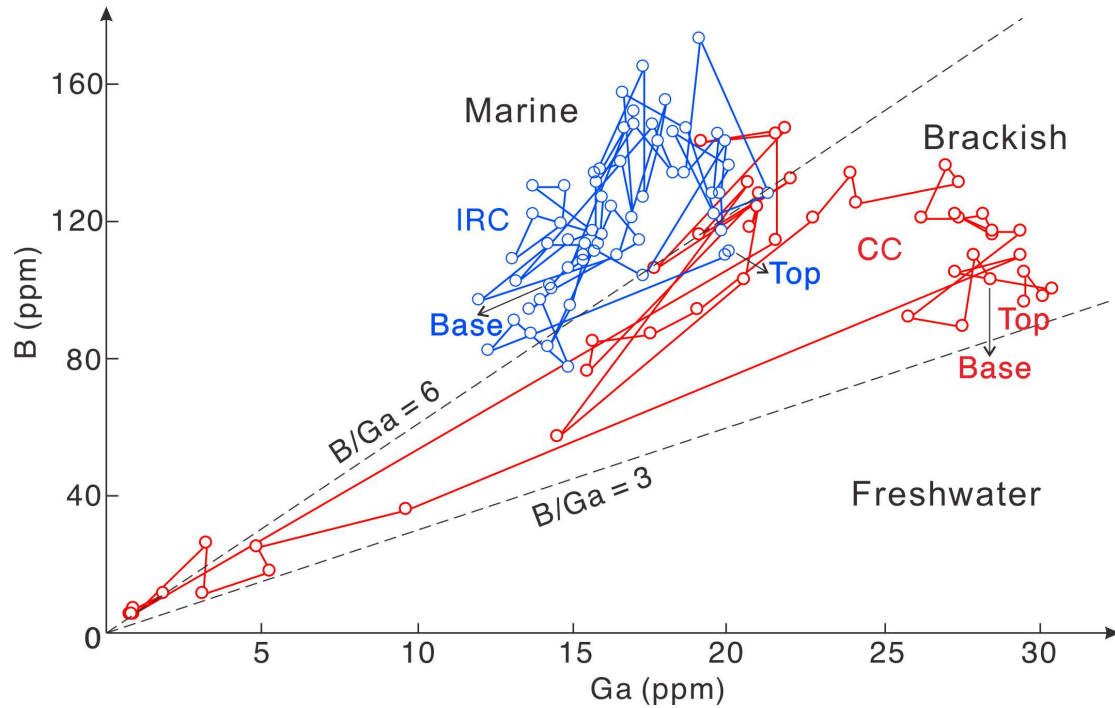

Figure S4. Covariation of B versus Ga for the IRC (blue) and CC (red) study cores. Both sections exhibit strong positive covariation: IRC ( $r = +0.59$ ,  $p < 0.01$ ) and CC ( $r = +0.87$ ,  $p < 0.01$ ), reflecting lithologic influence on raw [B] and [Ga] concentrations. The solid lines connect samples in stratigraphic order from the base to the top of each study core. The dashed lines represent salinity facies thresholds between marine ( $B/Ga > 6$ ), brackish ( $3-6$ ), and freshwater ( $< 3$ ) samples (from [Wei and Algeo, 2020](#)). Higher B/Ga ratios signify higher salinities at IRC (mostly marine) relative to CC (mostly brackish), recording a pronounced lateral gradient in salinity across the NAMS from the Midcontinent Shelf (marine) to the Illinois Basin (brackish).

## CALCULATION OF SEAWATER-SOURCED BORON FRACTION

In siliciclastic formations containing a significant clay mineral fraction, crossplots of Al versus B and Al versus Ga allow estimation of the abundances of the detrital and hydrogenous fractions of each element for each sample ([Fig. S5](#)). For Ga, strong positive covariation with Al demonstrates that most Ga is resident in the detrital fraction ([Spivack et al., 1987](#); [Wei and Algeo, 2020](#)), yielding similar estimates of detrital Ga/Al (2.7 ppm/%) for both IRC and CC.

For B, a ratio fitting the base of the data field at CC provides the best estimate of detrital B/Al ( $9 \pm 1$  ppm/%), and the same value was applied to IRC. For all plots, excess B and Ga above the dashed detrital lines represent the seawater-sourced (hydrogenous) fractions of each element. Computationally,  $B_{\text{detr}} = (B/Al)_{\text{detr}} \times Al$ , and  $B_{\text{sw}} = B_{\text{total}} - B_{\text{detr}}$ .

The isotopic composition of  $B_{\text{sw}}$  was calculated as  $\delta^{11}B_{\text{sw}} = \left( \frac{\delta^{11}B_{\text{meas}} \times B_{\text{total}} - \delta^{11}B_{\text{detr}} \times B_{\text{detr}}}{B_{\text{sw}}} \right)$ , where  $\delta^{11}B_{\text{meas}}$  is the measured composition of bulk boron, and  $\delta^{11}B_{\text{detr}}$  was assumed to be  $-9.1 \pm 2.4\text{‰}$  based on the B-isotopic composition of average continental crust (Lemarchand et al., 2012; Gaillardet and Lemarchand, 2018). Calculation of  $\delta^{11}B_{\text{sw}}$  for each sample yielded similar estimates for IRC (mean  $+5.5\text{‰}$ , range  $+4.4$  to  $+6.6\text{‰}$ ) and CC (mean  $+5.5\text{‰}$ , range  $+5.3$  to  $+5.9\text{‰}$ ). Modern marine shales on continental shelves exhibit relatively low bulk  $\delta^{11}B$  (median  $= -4.4\text{‰}$ , range  $= -6.6$  to  $-1.8\text{‰}$ ) due to the presence of large amounts of  $^{11}B$ -depleted eolian dust (Spivack et al., 1987; Ishikawa and Nakamura, 1993), but open-ocean sediments contain a ‘marine smectite’ component with  $\delta^{11}B$  ( $+4$  to  $+10\text{‰}$ ; Ishikawa and Nakamura, 1993) similar to the  $\delta^{11}B_{\text{sw}}$  of the present study units.

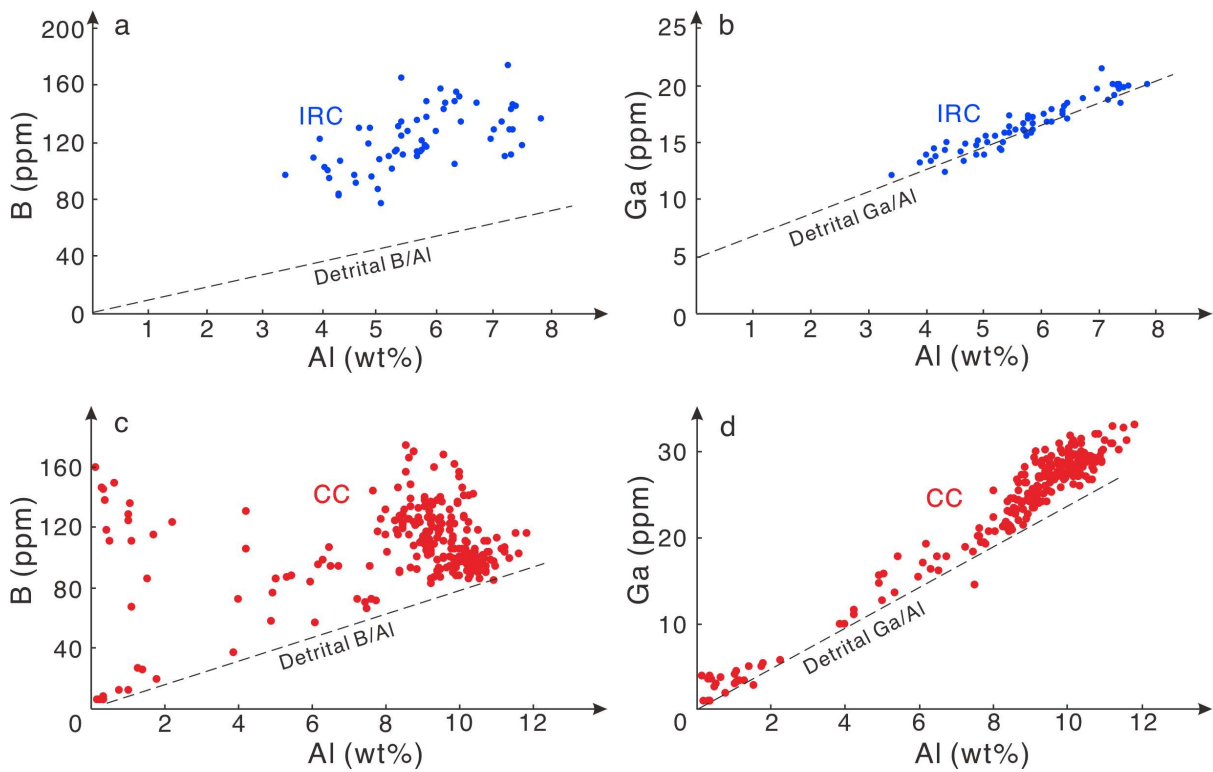

Figure S5. Crossplots of Al versus B (a,c) and Al versus Ga (b,d) for IRC (blue) and CC (red).

The dashed line in each panel represents the estimated B/Al or G/Al ratio of the detrital component. CC shows well-defined detrital ratios of  $9 \pm 1$  ppm/% for B/Al and 2.5 ppm/% for Ga/Al. IRC shows greater data scatter, although the detrital Ga/Al is similar to that at CC; the detrital B/Al at IRC could not be determined graphically and was assumed to be the same as at CC, which is reasonable given the similar detrital Ga/Al ratios of the two study sites.

## BORON ISOTOPE SYSTEMATICS

Boron isotopes exhibit substantial variation in natural systems. During weathering, B is adsorbed onto clay-mineral surfaces (Williams et al., 2001; Ercolani et al., 2019) or becomes structurally incorporated into secondary clay minerals (Voinot, et al., 2013; Gaillardet and Lemarchand, 2018). Both processes favor uptake of  $^{10}\text{B}$  in the solid phase by up to 30‰ (Rose et al., 2000; Noireaux et al., 2021), yielding lower  $\delta^{11}\text{B}$  values for weathered clays and aeolian dust (ca.  $-12 \pm 6$ ‰) and higher values for riverine ( $+2$ ‰ to  $+20$ ‰) and meteoric waters ( $+1$  to  $+26$ ‰; Rose-Koga et al., 2006; Mao et al., 2019). Seawater B, which is mainly ( $>90$ %) sourced from rivers (Spivack et al., 1987; Gaillardet and Lemarchand, 2018), has a homogeneous  $\delta^{11}\text{B}$  of  $+39.61 \pm 0.04$ ‰ (Ercolani et al., 2019; Mao et al., 2019) due to its long residence time ( $\sim 29$  Myr; Lemarchand et al., 2002).

Boron isotopic compositions are influenced by pH-controlled chemical speciation, with  $\text{B}(\text{OH})_3$  and  $\text{B}(\text{OH})_4^{-1}$  being the dominant species at low pH and high pH, respectively. In predominantly low-pH freshwater systems, B is present only as  $\text{B}(\text{OH})_3$ , resulting in a uniform B-isotopic composition, whereas in seawater, both  $\text{B}(\text{OH})_3$  ( $\delta^{11}\text{B} = +40.4$  to  $+45.2$ ‰) and  $\text{B}(\text{OH})_4^{-1}$  ( $\delta^{11}\text{B} = +19.4$  to  $+24.1$ ‰) are present (Rose-Koga et al., 2006; Mao et al., 2019). Whereas carbonate minerals take up only the latter species, yielding marine carbonate  $\delta^{11}\text{B}$  of  $+22.1 \pm 3$ ‰ (Hemming and Hanson, 1992), clay minerals can take up either B species depending on mineral surface charge and fluid pH, with low pH ( $< 7$ ) favoring  $\text{B}(\text{OH})_4^{-1}$  uptake and high pH ( $> 7$ ) favoring  $\text{B}(\text{OH})_3$  uptake (Williams et al., 2001; Kowalski and Wunder, 2018).

Modern marine carbonates faithfully record the  $\delta^{11}\text{B}$  of seawater  $\text{B}(\text{OH})_4^{-1}$  ( $+19.4$  to  $+24.1$ ‰), and the  $\delta^{11}\text{B}$  of carbonate samples of the present study is consistent with this B source.

The similarity of  $\delta^{11}\text{B}$  values of Pennsylvanian brachiopods (+12.4 to +15.8‰; Joachimski et al., 2005) to those of modern marine brachiopods (+16.8 to +19.7‰; Lécuyer et al., 2002) implies only minor differences in the  $\delta^{11}\text{B}$  of Pennsylvanian and modern seawater.

## REFERENCES CITED

- Berner, R. A., and Raiswell, R., 1983, Burial of organic carbon and pyrite sulfur in sediments over Phanerozoic time: a new theory: *Geochimica et Cosmochimica Acta*, v. 47, p. 855-862, [https://doi.org/10.1016/0016-7037\(83\)90151-5](https://doi.org/10.1016/0016-7037(83)90151-5)
- Ercolani, C., Lemarchand, D., and Dosseto, A., 2019, Insights on catchment-wide weathering regimes from boron isotopes in riverine material: *Geochimica et Cosmochimica Acta*, v. 261, p. 35-55, <https://doi.org/10.1016/j.gca.2019.07.002>
- Gaillardet, J., and Lemarchand, D., 2018, Boron in the weathering environment, *in* Marschall, H., and Foster, G. (eds.), *Boron Isotopes. Advances in Isotope Geochemistry*, Springer, Cham, pp. 163-188. [https://doi.org/10.1007/978-3-319-64666-4\\_7](https://doi.org/10.1007/978-3-319-64666-4_7)
- Hemming, N. G., and Hanson, G. N., 1992, Boron isotopic composition and concentration in modern marine carbonates: *Geochimica et Cosmochimica Acta*, v. 56, p. 537-543, [https://doi.org/10.1016/0016-7037\(92\)90151-8](https://doi.org/10.1016/0016-7037(92)90151-8)
- Ishikawa, T., and Nakamura, E., 1993, Boron isotope systematics of marine sediments: *Earth and Planetary Science Letters*, v. 117, p. 567-580, [https://doi.org/10.1016/0012821X\(93\)90103-G](https://doi.org/10.1016/0012821X(93)90103-G)
- Joachimski, M. M., Simon, L., Van Geldern, R., and Lécuyer, C., 2005, Boron isotope geochemistry of Paleozoic brachiopod calcite: implications for a secular change in the boron isotope geochemistry of seawater over the Phanerozoic: *Geochimica et Cosmochimica Acta*, v. 69, p. 4035-4044, <https://doi.org/10.1016/j.gca.2004.11.017>
- Kowalski, P. M., and Wunder, B., 2018, Boron isotope fractionation among vapor–liquids–solids–melts: Experiments and atomistic modeling. In: Marschall, H., and Foster, G. (Eds.) *Boron Isotopes: Advances in Isotope Geochemistry*. Springer, Cham. [https://doi.org/10.1007/978-3-319-64666-4\\_3](https://doi.org/10.1007/978-3-319-64666-4_3)



- Lécuyer, C., Grandjean, P., Reynard, B., Albarède, F., and Telouk, P., 2002,  $^{11}\text{B}/^{10}\text{B}$  analysis of geological materials by ICP–MS Plasma 54: application to the boron fractionation between brachiopod calcite and seawater: *Chemical Geology*, v. 186, p. 45-55, [https://doi.org/10.1016/S0009-2541\(01\)00425-9](https://doi.org/10.1016/S0009-2541(01)00425-9)
- Lemarchand, D., Gaillardet, J., Lewin, E. and Allègre, C. J., 2002, Boron isotope systematics in large rivers: implications for the marine boron budget and paleo-pH reconstruction over the Cenozoic: *Chemical Geology*, v. 190, p. 123–140, [https://doi.org/10.1016/S00092541\(02\)00114-6](https://doi.org/10.1016/S00092541(02)00114-6)
- Lemarchand, D., Cividini, D., Turpault, M. P. and Chabaux, F., 2012, Boron isotopes in different grain size fractions: Exploring past and present water–rock interactions from two soil profiles (Strengbach, Vosges Mountains): *Geochimica et Cosmochimica Acta.*, v. 98, p. 78–93, <https://doi.org/10.1016/j.gca.2012.09.009>
- Mao, H. R., Liu, C. Q., and Zhao, Z. Q., 2019, Source and evolution of dissolved boron in rivers: Insights from boron isotope signatures of end-members and model of boron isotopes during weathering processes: *Earth-Science Reviews*, v. 190, p. 439-459, <https://doi.org/10.1016/j.earscirev.2019.01.016>
- Noireaux, J., Sullivan, P. L., Gaillardet, J., Louvat, P., Steinhoefel, G., and Brantley, S. L., 2021, Developing boron isotopes to elucidate shale weathering in the critical zone: *Chemical Geology*, v. 559, 119900, <https://doi.org/10.1016/j.chemgeo.2020.119900>
- Rose, E. F. , Chaussidon, M. , and Francelanord, C., 2000, Fractionation of boron isotopes during erosion processes: the example of himalayan rivers: *Geochimica et Cosmochimica Acta*, v. 64, p. 397-408, [https://doi.org/10.1016/S0016-7037\(99\)00117-9](https://doi.org/10.1016/S0016-7037(99)00117-9)
- Rose-Koga, E. F., Sheppard, S. M. F., Chaussidon, M., and Carignan, J., 2006, Boron isotopic composition of atmospheric precipitations and liquid–vapour fractionations: *Geochimica et Cosmochimica Acta*, v. 70, p. 1603-1615, <https://doi.org/10.1016/j.gca.2006.01.003>
- Spivack, A. J., Palmer, M. R., and Edmond, J. M., 1987, The sedimentary cycle of the boron isotopes: *Geochimica et Cosmochimica Acta*, v. 51, p. 1939-1949, [https://doi.org/10.1016/0016-7037\(87\)90183-9](https://doi.org/10.1016/0016-7037(87)90183-9)

- Voinot, A., Lemarchand, D., Collignon, C., Granet, M., Chabaux, F., and Turpault, M. P., 2013, Experimental dissolution vs. transformation of micas under acidic soil conditions: clues from boron isotopes: *Geochimica et Cosmochimica Acta*, v. 117, p. 144-160, <https://doi.org/10.1016/j.gca.2013.04.012>
- Wei, W., and Algeo, T. J., 2020, Elemental proxies for paleosalinity analysis of ancient shales and mudrocks: *Geochimica et Cosmochimica Acta*, v. 287, p. 341-366, <https://doi.org/10.1016/j.gca.2019.06.034>
- Williams, L. B., Hervig, R. L., Holloway, J. R., and Hutcheon, I., 2001, Boron isotope geochemistry during diagenesis. Part I. Experimental determination of fractionation during illitization of smectite: *Geochimica et Cosmochimica Acta*, v. 65, p. 1769-1782, [https://doi.org/10.1016/S0016-7037\(01\)00557-9](https://doi.org/10.1016/S0016-7037(01)00557-9)
